# Supplementary material for: Burnout in Intensive Care Unit Workers during the Second Wave of the COVID-19 Pandemic: A Single Center Cross-Sectional Italian Study
Source: MDPI journal article supplement (doi:10.3390/ijerph18116102), 2021-06-05
Supplement: s1 [file s1]

**Supplementary material, Table S1. Emotional exhaustion sub score (EE) by severity categories (Reference=Low/Medium)**

|                                                                                    | Low and Medium<br>(N=80) | %    | High (N=56)             | %    | OR<br>or<br>F | CI 95%<br>or<br>p |
|------------------------------------------------------------------------------------|--------------------------|------|-------------------------|------|---------------|-------------------|
| <b>Age:</b>                                                                        |                          |      |                         |      |               |                   |
| < 35                                                                               | 27                       | 33.8 | 27                      | 48.2 | 1.83          | 0.91-3.68         |
| ≥35                                                                                | 53                       | 66.3 | 29                      | 51.8 | Ref           |                   |
| Missing                                                                            | -                        |      |                         |      |               |                   |
| <b>Age*</b>                                                                        | 80; 40.1; 38<br>(23-68)  |      | 56; 37.8; 35<br>(24-58) |      | 1.73          | 0.1904            |
| Missing                                                                            | -                        |      | -                       |      |               |                   |
| <b>Sex:</b>                                                                        |                          |      |                         |      |               |                   |
| Male                                                                               | 38                       | 48.7 | 17                      | 30.4 | 0.46          | 0.22-0.94         |
| Female                                                                             | 40                       | 51.3 | 39                      | 69.6 | Ref           |                   |
| Missing                                                                            | 2                        |      | -                       |      |               |                   |
| <b>Profession:</b>                                                                 |                          |      |                         |      |               |                   |
| Nurse                                                                              | 49                       | 61.3 | 35                      | 62.5 | Ref           |                   |
| Physician                                                                          | 31                       | 38.8 | 21                      | 37.5 | 0.95          | 0.47-1.92         |
| Missing                                                                            | -                        |      | -                       |      |               |                   |
| <b>Living alone:</b>                                                               |                          |      |                         |      |               |                   |
| Yes                                                                                | 13                       | 19.4 | 17                      | 34.7 | 2.21          | 0.95-5.13         |
| No                                                                                 | 54                       | 80.6 | 32                      | 65.3 | Ref           |                   |
| Missing                                                                            | 13                       |      | 7                       |      |               |                   |
| <b>Worry about transmitting the virus to the people you live with:</b>             |                          |      |                         |      |               |                   |
| No/a little                                                                        | 23                       | 44.2 | 10                      | 33.3 | 0.63          | 0.25-1.61         |
| A lot                                                                              | 29                       | 55.8 | 20                      | 66.7 | Ref           |                   |
| Missing                                                                            | 2                        |      | 2                       |      |               |                   |
| <b>Years of work experience</b>                                                    | 69; 13.8;10 (0-42)       |      | 45;13.6;12<br>(0-36)    |      | 0.01          | 0.9386            |
| Missing                                                                            | 11                       |      | 11                      |      |               |                   |
| <b>Work area before the pandemic:</b>                                              |                          |      |                         |      |               |                   |
| ICU                                                                                | 48                       | 63.2 | 39                      | 73.6 | 1.62          | 0.75-3.50         |
| Operating room/<br>surgery/ Other                                                  | 28                       | 36.8 | 14                      | 26.4 | Ref           |                   |
| Missing                                                                            | 4                        |      | 3                       |      |               |                   |
| <b>Difficulties in adapting to the new work environment:</b>                       |                          |      |                         |      |               |                   |
| Not at all                                                                         | 41                       | 53.9 | 16                      | 33.3 | Ref           |                   |
| Yes                                                                                | 35                       | 46.1 | 32                      | 66.7 | 2.34          | 1.11-4.96         |
| Missing                                                                            | 4                        |      | 8                       |      |               |                   |
| <b>Compared to before the Covid-19 emergency, the patient number/workload has:</b> |                          |      |                         |      |               |                   |

|                                                                                                                  |    |      |    |      |       |            |
|------------------------------------------------------------------------------------------------------------------|----|------|----|------|-------|------------|
| Increased                                                                                                        | 38 | 53.5 | 35 | 64.8 | Ref   |            |
| Equal/diminished                                                                                                 | 33 | 46.5 | 19 | 35.2 | 0.62  | 0.30-1.29  |
| Missing                                                                                                          | 9  |      | 2  |      |       |            |
| <b>Compared to before the Covid-19 emergency, how do you evaluate the relationship with your colleagues?</b>     |    |      |    |      |       |            |
| Improved                                                                                                         | 45 | 61.6 | 26 | 51.0 | Ref   |            |
| Equal/ Got worse                                                                                                 | 28 | 38.4 | 25 | 49.0 | 1.54  | 0.75-3.19  |
| Missing                                                                                                          | 7  |      | 5  |      |       |            |
| <b>Compared to before the Covid emergency, there are opportunities to discuss important decisions in groups:</b> |    |      |    |      |       |            |
| More frequent                                                                                                    | 36 | 48.0 | 24 | 48.0 | Ref   |            |
| Equal/ Less frequent                                                                                             | 39 | 52.0 | 26 | 52.0 | 1.00  | 0.49-2.05  |
| Missing                                                                                                          | 5  |      | 6  |      |       |            |
| <b>Do you feel protected when you work?</b>                                                                      |    |      |    |      |       |            |
| No /a little bit                                                                                                 | 25 | 31.6 | 30 | 57.7 | 2.94  | 1.42-6.09  |
| Protected                                                                                                        | 54 | 68.4 | 22 | 42.3 | Ref   |            |
| Missing                                                                                                          | 1  |      | 4  |      |       |            |
| <b>Hospital anxiety and depression scale:</b>                                                                    |    |      |    |      |       |            |
| <b>Anxiety</b>                                                                                                   |    |      |    |      |       |            |
| Normal anxiety                                                                                                   | 51 | 69.9 | 9  | 16.4 | Ref   |            |
| Presence of symptoms of anxiety                                                                                  | 22 | 30.1 | 46 | 83.6 | 11.84 | 4.95-28.33 |
| Missing                                                                                                          | 7  |      | 1  |      |       |            |
| <b>Depression</b>                                                                                                |    |      |    |      |       |            |
| Normal depression                                                                                                | 59 | 77.6 | 10 | 20.0 | Ref   |            |
| Presence of symptoms of depression                                                                               | 17 | 22.4 | 40 | 80.0 | 13.88 | 5.77-33.41 |
| Missing                                                                                                          | 4  |      | 6  |      |       |            |
| <b>Resilience</b>                                                                                                |    |      |    |      |       |            |
| Low or very low                                                                                                  | 8  | 10.0 | 16 | 28.6 | 3.60  | 1.42-9.15  |
| Moderate or high                                                                                                 | 72 | 90.0 | 40 | 71.4 | Ref   |            |
| Missing                                                                                                          |    |      |    |      |       |            |
| <b>Insomnia</b>                                                                                                  |    |      |    |      |       |            |
| Clinical insomnia                                                                                                | 33 | 47.1 | 42 | 80.8 | 4.71  | 2.04-10.84 |
| No clinically significant insomnia                                                                               | 37 | 52.9 | 10 | 19.2 | Ref   |            |
| Missing                                                                                                          | 10 |      | 4  |      |       |            |

\* N.; Mean; Median (Range)

**Supplementary material, Table S2. Depersonalization sub score (DP) by severity categories (Reference= Low/Medium)**

|             | <i>Low and Medium<br/>(N=71)</i> | <i>%</i> | <i>High (N=65)</i> | <i>%</i> | <i>OR<br/>or<br/>F</i> | <i>CI 95%<br/>or<br/>p</i> |
|-------------|----------------------------------|----------|--------------------|----------|------------------------|----------------------------|
| <b>Age:</b> |                                  |          |                    |          |                        |                            |
| < 35        | 24                               | 33.8     | 30                 | 46.2     | 1.68                   | 0.84-3.35                  |

|                                                                                    |                         |      |                         |      |      |           |
|------------------------------------------------------------------------------------|-------------------------|------|-------------------------|------|------|-----------|
| ≥35                                                                                | 47                      | 66.2 | 35                      | 53.8 | Ref  |           |
| Missing                                                                            | -                       |      | -                       |      |      |           |
| <b>Age*</b>                                                                        | 71; 39.9; 38<br>(23-58) |      | 65; 38.3; 37<br>(23-68) |      | 1.00 | 0.3192    |
| Missing                                                                            | -                       |      | -                       |      |      |           |
| <b>Sex:</b>                                                                        |                         |      |                         |      |      |           |
| Male                                                                               | 28                      | 40.6 | 27                      | 41.5 | 1.04 | 0.52-2.07 |
| Female                                                                             | 41                      | 59.4 | 38                      | 58.5 | Ref  |           |
| Missing                                                                            | 2                       |      | -                       |      |      |           |
| <b>Profession:</b>                                                                 |                         |      |                         |      |      |           |
| Nurse                                                                              | 38                      | 53.5 | 46                      | 70.8 | Ref  |           |
| Physician                                                                          | 33                      | 46.5 | 19                      | 29.2 | 0.48 | 0.23-0.97 |
| Missing                                                                            | -                       |      | -                       |      |      |           |
| <b>Living alone:</b>                                                               |                         |      |                         |      |      |           |
| Yes                                                                                | 15                      | 25.0 | 15                      | 26.8 | 1.10 | 0.48-2.52 |
| No                                                                                 | 45                      | 75.0 | 41                      | 73.2 | Ref  |           |
| Missing                                                                            | 11                      |      | 9                       |      |      |           |
| <b>Worry about transmitting the virus to the people you live with:</b>             |                         |      |                         |      |      |           |
| No/a little                                                                        | 23                      | 54.8 | 25                      | 62.5 | 0.80 | 0.33-1.94 |
| A lot                                                                              | 19                      | 45.2 | 15                      | 37.5 | Ref  |           |
| Missing                                                                            | 3                       |      | 1                       |      |      |           |
| <b>Years of work experience</b>                                                    | 62;12.5;7 (0-34)        |      | 52;15.2;13.5 (0-41)     |      | 1.66 | 0.2006    |
| Missing                                                                            | 9                       |      | 13                      |      |      |           |
| <b>Work area before the pandemic:</b>                                              |                         |      |                         |      |      |           |
| ICU                                                                                | 42                      | 61.8 | 45                      | 73.8 | 1.74 | 0.82-3.69 |
| Operating room/ surgery/ Other                                                     | 26                      | 38.2 | 16                      | 26.2 | Ref  |           |
| Missing                                                                            | 3                       |      | 4                       |      |      |           |
| <b>Difficulties in adapting to the new work environment:</b>                       |                         |      |                         |      |      |           |
| Not at all                                                                         | 32                      | 50.0 | 25                      | 41.7 | Ref  |           |
| Yes                                                                                | 32                      | 50.0 | 35                      | 58.3 | 1.40 | 0.69-2.85 |
| Missing                                                                            | 7                       |      | 5                       |      |      |           |
| <b>Compared to before the Covid-19 emergency, the patient number/workload has:</b> |                         |      |                         |      |      |           |
| Increased                                                                          | 45                      | 68.2 | 28                      | 47.5 | Ref  |           |
| Equal/diminished                                                                   | 21                      | 31.8 | 31                      | 52.5 | 2.37 | 1.15-4.91 |
| Missing                                                                            | 5                       |      | 6                       |      |      |           |
| <b>Compared to before the Covid-19 emergency, How do you evaluate the</b>          |                         |      |                         |      |      |           |

|                                                                                                                     |    |      |    |      |      |           |
|---------------------------------------------------------------------------------------------------------------------|----|------|----|------|------|-----------|
| <b>relationship with your colleagues?</b>                                                                           |    |      |    |      |      |           |
| Improved                                                                                                            | 39 | 58.2 | 32 | 56.1 | Ref  |           |
| Equal/ Got worse                                                                                                    | 28 | 41.8 | 25 | 43.9 | 1.09 | 0.53-2.22 |
| Missing                                                                                                             | 4  |      | 8  |      |      |           |
| <b>Compared to before the Covid-19 emergency, there are opportunities to discuss important decisions in groups:</b> |    |      |    |      |      |           |
| More frequent                                                                                                       | 31 | 44.9 | 29 | 51.8 | Ref  |           |
| Equal/ Less frequent                                                                                                | 38 | 55.1 | 27 | 48.2 | 0.76 | 0.37-1.54 |
| Missing                                                                                                             | 2  |      | 9  |      |      |           |
| <b>Do you feel protected when you work?</b>                                                                         |    |      |    |      |      |           |
| No /a little bit                                                                                                    | 24 | 34.3 | 31 | 50.8 | 1.98 | 0.98-4.00 |
| Protected                                                                                                           | 46 | 65.7 | 30 | 49.2 | Ref  |           |
| Missing                                                                                                             | 1  |      | 4  |      |      |           |
| <b>Hospital anxiety and depression scale:</b>                                                                       |    |      |    |      |      |           |
| <b>Anxiety</b>                                                                                                      |    |      |    |      |      |           |
| Normal anxiety                                                                                                      | 40 | 58.8 | 20 | 33.3 | Ref  |           |
| Presence of symptoms of anxiety                                                                                     | 28 | 41.2 | 40 | 66.7 | 2.86 | 1.39-5.88 |
| Missing                                                                                                             | 3  |      | 5  |      |      |           |
| <b>Depression</b>                                                                                                   |    |      |    |      |      |           |
| Normal depression                                                                                                   | 46 | 69.7 | 23 | 38.3 | Ref  |           |
| Presence of symptoms of depression                                                                                  | 20 | 30.3 | 37 | 61.7 | 3.70 | 1.77-7.75 |
| Missing                                                                                                             | 5  |      | 5  |      |      |           |
| <b>Resilience</b>                                                                                                   |    |      |    |      |      |           |
| Low or very low                                                                                                     | 8  | 11.3 | 16 | 24.6 | 2.57 | 1.02-6.50 |
| Moderate or high                                                                                                    | 63 | 88.7 | 49 | 75.4 | Ref  |           |
| Missing                                                                                                             | -  |      | -  |      |      |           |
| <b>Insomnia</b>                                                                                                     |    |      |    |      |      |           |
| Clinical insomnia                                                                                                   | 35 | 55.6 | 49 | 83.1 | 1.68 | 0.80-3.52 |
| No clinically significant insomnia                                                                                  | 28 | 44.4 | 19 | 32.2 | Ref  |           |
| Missing                                                                                                             | 8  |      | 6  |      |      |           |

\* N.; Mean; Median (Range)

**Supplementary material, Table S3. Personal accomplishment sub score (PA) by severity categories (Reference=High/Medium)**

|             | High/Medium<br>(N=64) | %    | Low<br>(N=72) | %    | OR<br>or<br>F | CI 95%<br>or<br>p |
|-------------|-----------------------|------|---------------|------|---------------|-------------------|
| <b>Age:</b> |                       |      |               |      |               |                   |
| < 35        | 20                    | 31.3 | 34            | 47.2 | 1.97          | 0.97-3.97         |
| ≥35         | 44                    | 68.8 | 38            | 52.8 | Ref           |                   |
| Missing     | -                     |      | -             |      |               |                   |

|                                                                                                              |                         |      |                         |      |      |           |
|--------------------------------------------------------------------------------------------------------------|-------------------------|------|-------------------------|------|------|-----------|
| <b>Age*</b>                                                                                                  | 64; 39.9; 38<br>(23-68) |      | 72; 38.4; 36<br>(24-58) |      | 0.83 | 0.3634    |
| <i>Missing</i>                                                                                               | -                       |      | -                       |      |      |           |
| <b>Sex:</b>                                                                                                  |                         |      |                         |      |      |           |
| Male                                                                                                         | 25                      | 40.3 | 30                      | 41.7 | 1.06 | 0.53-2.11 |
| Female                                                                                                       | 37                      | 59.7 | 42                      | 58.3 | Ref  |           |
| <i>Missing</i>                                                                                               | 2                       |      | -                       |      |      |           |
| <b>Profession:</b>                                                                                           |                         |      |                         |      |      |           |
| Nurse                                                                                                        | 40                      | 62.5 | 44                      | 61.1 | Ref  |           |
| Physician                                                                                                    | 24                      | 37.5 | 28                      | 38.9 | 1.06 | 0.53-2.12 |
| <i>Missing</i>                                                                                               | -                       |      | -                       |      |      |           |
| <b>Living alone:</b>                                                                                         |                         |      |                         |      |      |           |
| Yes                                                                                                          | 11                      | 20.0 | 19                      | 31.1 | 1.81 | 0.77-4.25 |
| No                                                                                                           | 44                      | 80.0 | 42                      | 68.9 | Ref  |           |
| <i>Missing</i>                                                                                               | 9                       |      | 11                      |      |      |           |
| <b>Worry about transmitting the virus to the people you live with:</b>                                       |                         |      |                         |      |      |           |
| No/a little                                                                                                  | 19                      | 44.2 | 14                      | 35.9 | 0.71 | 0.29-1.72 |
| A lot                                                                                                        | 24                      | 55.8 | 25                      | 64.1 | Ref  |           |
| <i>Missing</i>                                                                                               | 1                       |      | 3                       |      |      |           |
| <b>Years of work experience</b>                                                                              | 59;13.8;12 (0-41)       |      | 55;13.7;9 (0-36)        |      | 0.01 | 0.9412    |
| <i>Missing</i>                                                                                               | 5                       |      | 17                      |      |      |           |
| <b>Work area before the pandemic:</b>                                                                        |                         |      |                         |      |      |           |
| ICU                                                                                                          | 44                      | 72.1 | 43                      | 63.2 | 0.66 | 0.31-1.40 |
| Operating room/<br>surgery/ Other                                                                            | 17                      | 27.9 | 25                      | 36.8 | Ref  |           |
| <i>Missing</i>                                                                                               | 3                       |      | 4                       |      |      |           |
| <b>Difficulties in adapting to the new work environment:</b>                                                 |                         |      |                         |      |      |           |
| Not at all                                                                                                   | 26                      | 45.6 | 31                      | 46.3 | Ref  |           |
| Yes                                                                                                          | 31                      | 54.4 | 36                      | 53.7 | 0.97 | 0.48-1.98 |
| <i>Missing</i>                                                                                               | 7                       |      | 5                       |      |      |           |
| <b>Compared to before the Covid-19 emergency, the patient number/workload has:</b>                           |                         |      |                         |      |      |           |
| Increased                                                                                                    | 37                      | 61.7 | 36                      | 55.4 | Ref  |           |
| Equal/diminished                                                                                             | 23                      | 38.3 | 29                      | 44.6 | 1.30 | 0.63-2.65 |
| <i>Missing</i>                                                                                               | 4                       |      | 7                       |      |      |           |
| <b>Compared to before the Covid-19 emergency, how do you evaluate the relationship with your colleagues?</b> |                         |      |                         |      |      |           |

|                                                                                                                     |    |      |    |      |       |            |
|---------------------------------------------------------------------------------------------------------------------|----|------|----|------|-------|------------|
| Improved                                                                                                            | 33 | 58.9 | 38 | 55.9 | Ref   |            |
| Equal/ Got worse                                                                                                    | 23 | 41.1 | 30 | 44.1 | 1.13  | 0.55-2.32  |
| Missing                                                                                                             | 8  |      | 4  |      |       |            |
| <b>Compared to before the Covid-19 emergency, there are opportunities to discuss important decisions in groups:</b> |    |      |    |      |       |            |
| More frequent                                                                                                       | 28 | 46.7 | 32 | 49.2 | Ref   |            |
| Equal/ Less frequent                                                                                                | 32 | 53.3 | 33 | 50.8 | 0.90  | 0.45-1.82  |
| Missing                                                                                                             | 4  |      | 7  |      |       |            |
| <b>Do you feel protected when you work?</b>                                                                         |    |      |    |      |       |            |
| No /a little bit                                                                                                    | 18 | 28.6 | 37 | 54.4 | 2.98  | 1.44-6.16  |
| Protected                                                                                                           | 45 | 71.4 | 31 | 45.6 | Ref   |            |
| Missing                                                                                                             | 1  |      | 4  |      |       |            |
| <b>Hospital anxiety and depression scale:</b>                                                                       |    |      |    |      |       |            |
| <b>Anxiety</b>                                                                                                      |    |      |    |      |       |            |
| Normal anxiety                                                                                                      | 35 | 58.3 | 25 | 36.8 | Ref   |            |
| Presence of symptoms of anxiety                                                                                     | 25 | 41.7 | 43 | 63.2 | 2.41  | 1.18-4.91  |
| Missing                                                                                                             | 4  |      | 4  |      |       |            |
| <b>Depression</b>                                                                                                   |    |      |    |      |       |            |
| Normal depression                                                                                                   | 40 | 67.8 | 29 | 43.3 | Ref   |            |
| Presence of symptoms of depression                                                                                  | 19 | 32.2 | 38 | 56.7 | 2.76  | 1.33-5.72  |
| Missing                                                                                                             | 5  |      | 5  |      |       |            |
| <b>Resilience</b>                                                                                                   |    |      |    |      |       |            |
| Low or very low                                                                                                     | 2  | 3.1  | 22 | 30.6 | 13.64 | 3.06-60.80 |
| Moderate or high                                                                                                    | 62 | 96.9 | 50 | 69.4 | Ref   |            |
| Missing                                                                                                             | -  |      | -  |      |       |            |
| <b>Insomnia</b>                                                                                                     |    |      |    |      |       |            |
| Clinical insomnia                                                                                                   | 37 | 63.8 | 38 | 59.4 | 0.83  | 0.40-1.72  |
| No clinically significant insomnia                                                                                  | 21 | 36.2 | 26 | 40.6 | Ref   |            |
| Missing                                                                                                             | 6  |      | 8  |      |       |            |

\* N.; Mean; Median (Range)
